# Supplementary material
Source: PubMed Central journal article supplement (PMC4741040)
Supplement: CJN.06200615_CJN06200615SupplementaryData.pdf [file CJN.06200615_CJN06200615SupplementaryData.pdf]

**Authors:**

Kalani L. Raphael, MD, MS<sup>1</sup>, Rachel A. Murphy, PhD<sup>2</sup>, Michael G. Shlipak, MD, MPH<sup>3</sup>, Suzanne Satterfield, MD, DrPh<sup>4</sup>, Hunter K. Huston, MD<sup>1</sup>, Anthony Sebastian, MD<sup>5</sup>, Deborah E. Sellmeyer, MD<sup>6</sup>, Kushang V. Patel, PhD, MPH<sup>7</sup>, Anne B. Newman, MD, MPH<sup>8</sup>, Mark J. Sarnak, MD, MS<sup>9</sup>, Joachim H. Ix, MD, MAS<sup>10</sup>, and Linda F. Fried, MD, MPH<sup>11</sup> for the Health ABC Study

**Affiliations:**

<sup>1</sup>Salt Lake City Veterans Affairs Healthcare System and Department of Internal Medicine, University of Utah, Salt Lake City, Utah;

<sup>2</sup>Laboratory of Epidemiology and Population Sciences, Intramural Research Program, National Institute on Aging, Bethesda, Maryland;

<sup>3</sup>San Francisco Veterans Affairs Medical Center and Department of Medicine, University of California San Francisco, San Francisco, California;

<sup>4</sup>Department of Preventive Medicine, University of Tennessee Health Science Center, Memphis, Tennessee;

<sup>5</sup>Department of Medicine, Division of Nephrology, University of California San Francisco, San Francisco, California;

<sup>6</sup>Division of Endocrinology, Department of Medicine, Johns Hopkins Hospital, Johns Hopkins University, Baltimore, Maryland;

<sup>7</sup>Department of Anesthesiology and Pain Medicine, University of Washington, Seattle, Washington;

<sup>8</sup>Department of Epidemiology, University of Pittsburgh, Pittsburgh, Pennsylvania;

<sup>9</sup>Division of Nephrology, Department of Medicine, Tufts Medical Center, Boston, Massachusetts;

<sup>10</sup>Division of Nephrology-Hypertension, Department of Medicine, University of California San Diego and Veterans Affairs San Diego Healthcare System, San Diego, California; and

<sup>11</sup>VA Pittsburgh Healthcare System and Department of Medicine and Department of Epidemiology, University of Pittsburgh, Pittsburgh, Pennsylvania.
